# Supplementary material for: Sleep Disorders in Pediatric Migraine: A Questionnaire-Based Study
Source: MDPI journal article supplement (doi:10.3390/jcm10163575), 2021-08-14
Supplement: s1 [file s1]

- Age at headache onset
- Did your child receive a specific diagnosis?
  - o Migraine with aura
  - o Migraine without aura
  - o Tension type headache
  - o He doesn't have a diagnosis
  - o Other (specify)
- Which is the pain localization during headache attacks?
- Mono- or bilateral pain?
- Could you define the pain as gravative or pulsating?
- Is the pain accompanied by other manifestations?
  - o Photophobia
  - o Phonophobia
  - o Nausea
  - o Vomiting
  - o Vertigo
  - o None
  - o Other(specify)
- Is there any aura?
- Did your child present any of the followings?
  - o Infantile colic
  - o Recurrent abdominal pain
  - o Vertigo
  - o Cyclical vomiting
  - o Limb pain
  - o Kinetosis
  - o Paroxysmal torticollis
- Is there a positive familial history for headache?
- Which is the habitual frequency of headache attacks?
- Which was the frequency of attacks in the last 2 months?
- How many times did the headache cause the child interrupting his daily activities?
- How many times did your child need an abortive medication for headache in the last 2 months?
- Which drugs did he usually take in case of headache?
- Are these drugs usually effective?
- Did he take, or is he actually taking, any prophylaxis treatment? And which?
- Are they effective?
